# Supplementary material for: Inhibition of the intestinal postprandial glucose transport by gallic acid and gallic acid derivatives
Source: Royal Society of Chemistry journal article supplement (doi:10.1039/d1fo01118a), 2021-01-01
Supplement: d1fo01118a1.pdf [file d1fo01118a1.pdf]

1     **Inhibition of the intestinal postprandial glucose transport by gallic**  
2                             **acid and gallic acid derivatives**

3 Huijun Wang <sup>a,b</sup>, Mark I. Fowler <sup>b</sup>, David J. Messenger <sup>b</sup>, Jose Juan Ordaz-Ortiz <sup>c,f</sup>, Xuelan Gu <sup>d</sup>,  
4 Songshan Shi <sup>a</sup>, Leon A. Terry <sup>c</sup>, Mark J. Berry <sup>b</sup>, Guoping Lian <sup>b,e,\*</sup>, Shunchun Wang <sup>a,\*</sup>

5 <sup>a</sup> The MOE Key Laboratory for Standardization of Chinese Medicines and the SATCM Key  
6 Laboratory for New Resources and Quality Evaluation of Chinese Medicines, Institute of Chinese  
7 Materia Medica, Shanghai University of Traditional Chinese Medicine, 1200 Cailun Road,  
8 Shanghai 201203, P. R. China;

9 <sup>b</sup> Unilever R&D Colworth, Colworth Science Park, Sharnbrook, Bedford MK44 1LQ, U.K.;

10 <sup>c</sup> Plant Science Laboratory, Cranfield University, MK43 0AL, U.K.;

11 <sup>d</sup> Unilever R&D Shanghai, 5/F, 66 Lin Xin Road, Shanghai 200335, P. R. China;

12 <sup>e</sup> Department of Chemical and Process Engineering, University of Surrey, Guildford, GU2 7XH, UK.

13 <sup>f</sup> National Laboratory of Genomics for Biodiversity, CINVESTAV IPN, 36824 Irapuato, Guanajuato,  
14 Mexico.

15 **CORRESPONDING AUTHORS**

16 \* Guoping Lian, Unilever R&D Colworth, Colworth Science Park, Sharnbrook, Bedford MK44 1LQ,  
17 U.K. Tel.: +44 1234222741; E-Mail: [Guoping.Lian@unilever.com](mailto:Guoping.Lian@unilever.com) (G.L.)

18 \* Shunchun Wang, Institute of Chinese Materia Medica, Shanghai University of Traditional Chinese  
19 Medicine, 1200 Cailun Road, Shanghai 201203, P. R. China; Tel.: +86-21-5132-2511; Fax: +86-21-  
20 5132-2519; E-Mail: [shunchunwang@126.com](mailto:shunchunwang@126.com) (S.W.)

21

22

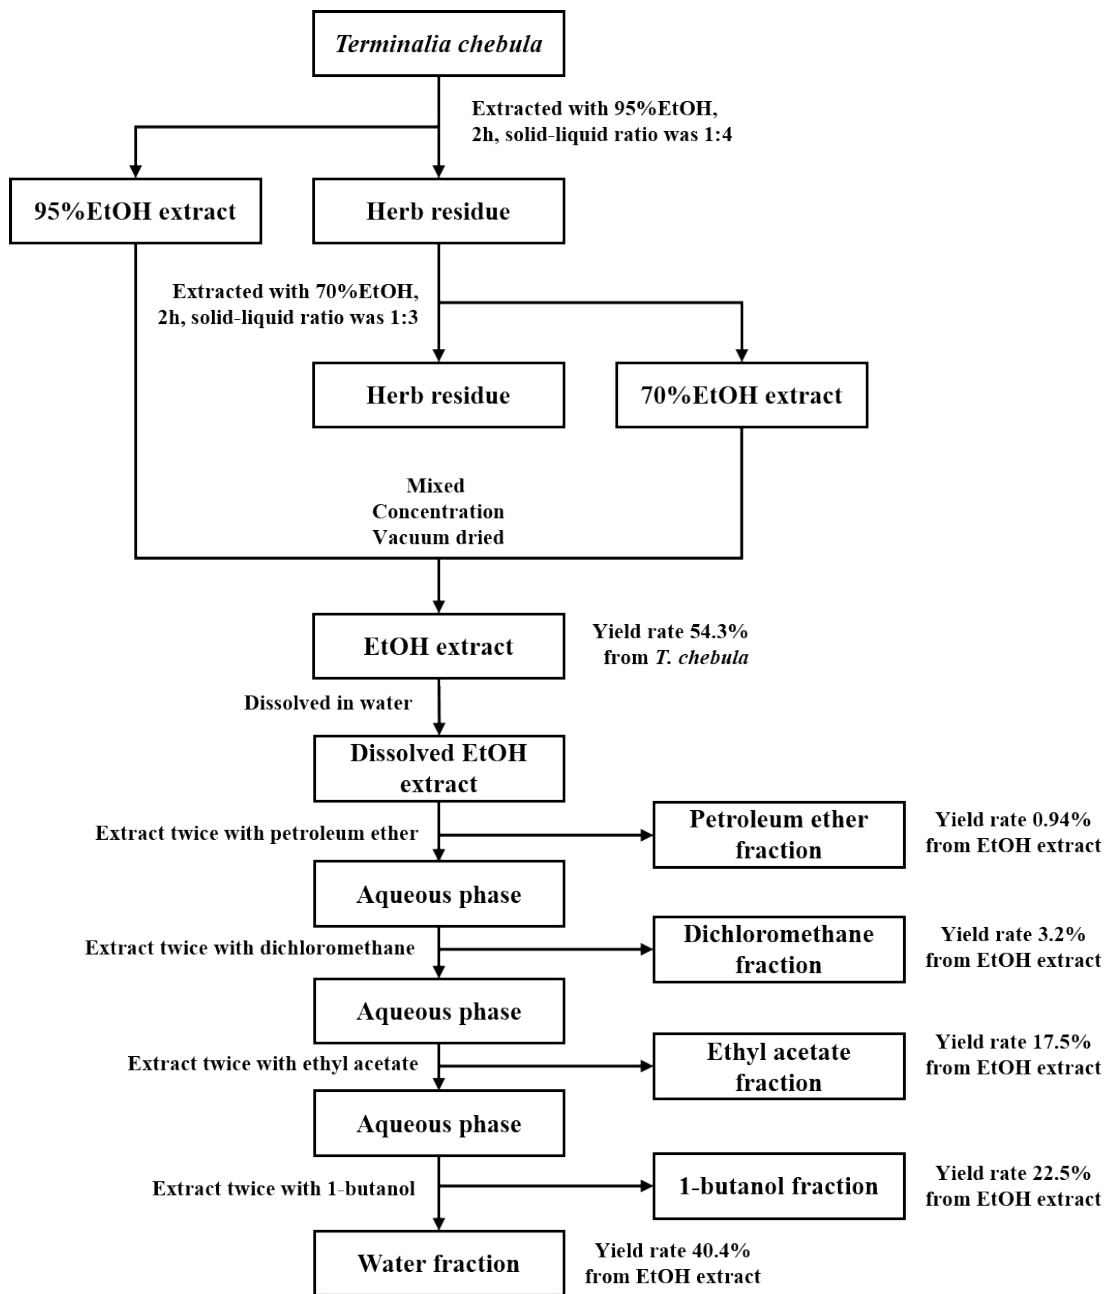

23

24 **Figure S1.** Flow chart of the extraction and fractionation from *Terminalia chebula* Retz., fructus  
 25 immaturus.

26

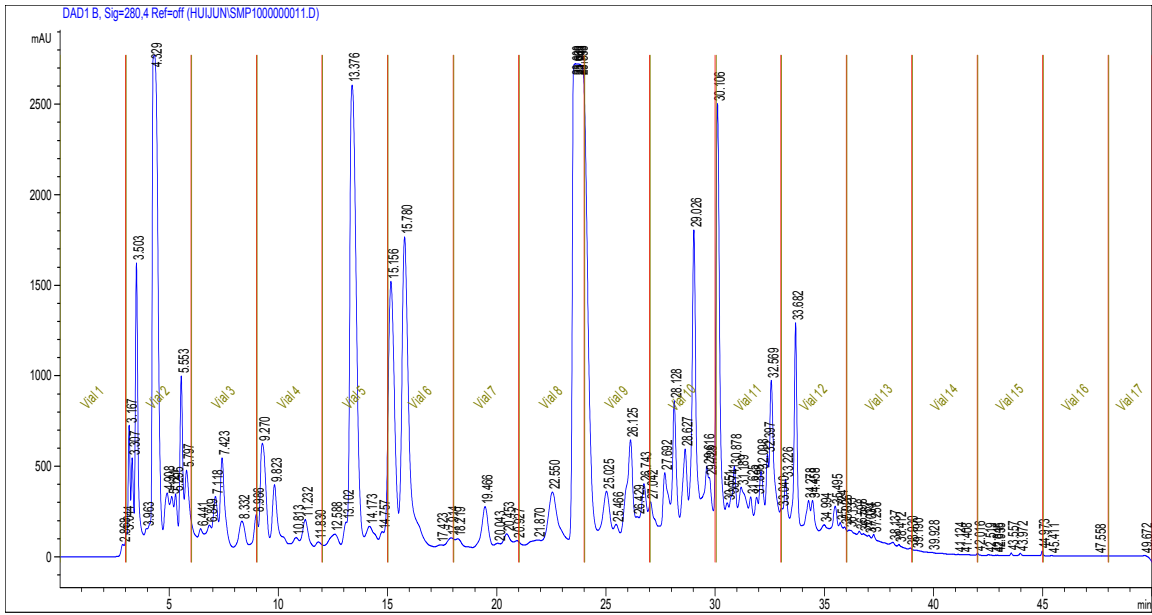

27

28 **Figure S2.** 1-butanol extract from *T. chebula* aqueous ethanol extract was divided into 17 fractions  
 29 after separation by HPLC and collected by Agilent 1260 infinity LC fraction collector (1 tube/3  
 30 minutes)

31

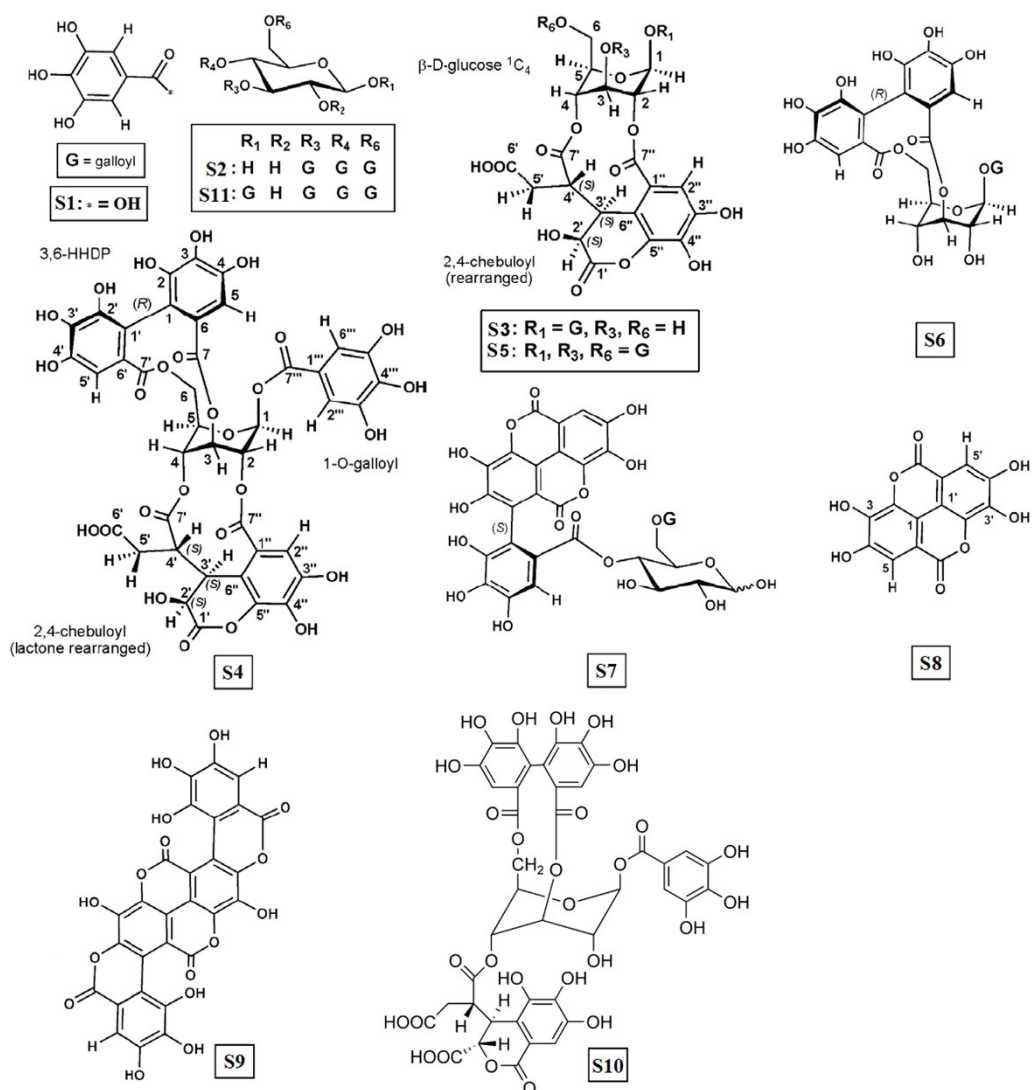

32

33 **Figure S3.** Gallic acid and gallic acid derivatives characterization of chemical constituents from  
 34 active fractions of *T. chebula*. The structures shown are based on UPLC-ESI-Q-TOF/MS data, in  
 35 some cases ambiguities may remain concerning linkage positions, configuration, etc. Compound  
 36 numbers, names and molecular formulas are presented in Table 2.

37

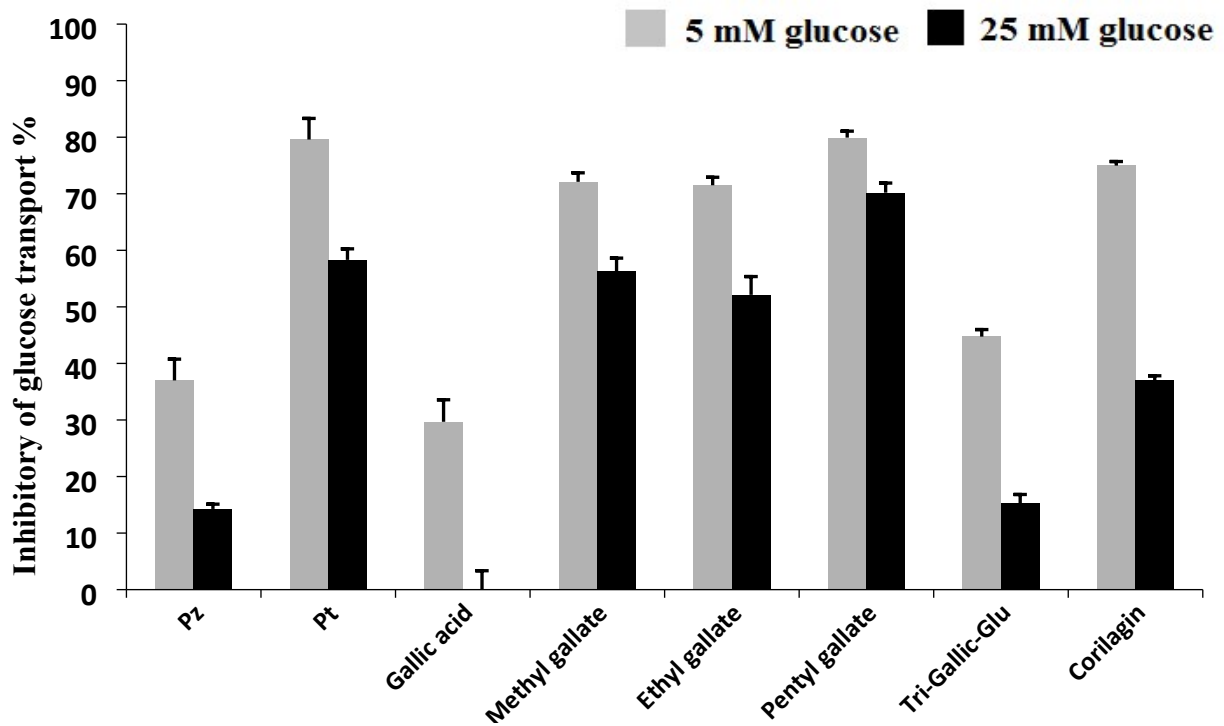

38

39 **Figure S4.** Gallic acid and its derivatives inhibition of glucose transport at 5 mM glucose and 25 mM  
 40 glucose in Caco-2 cells (n=3). Phloridzin (Pz) was tested at 300  $\mu$ M and Phloretin (Pt) was tested at  
 41 150  $\mu$ M. The other samples were tested at 200  $\mu$ M.

42

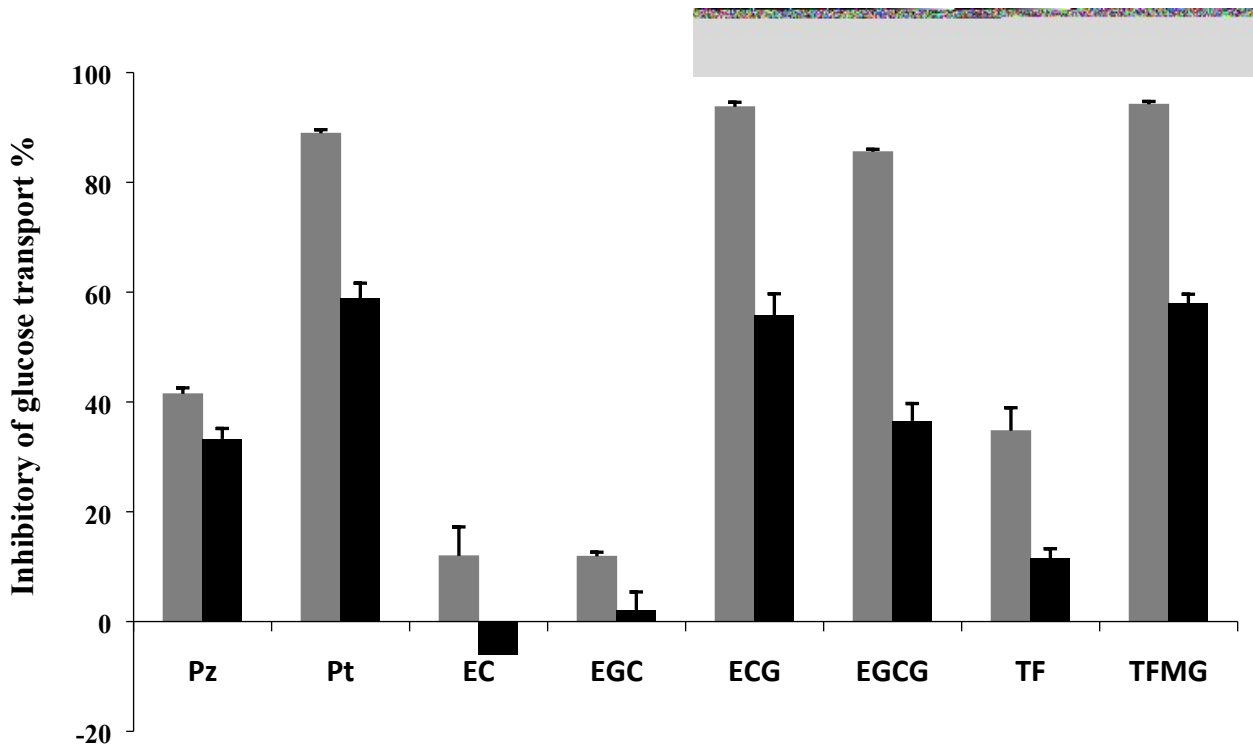

43

44 **Figure S5.** Gallic acid derivatives of flavonoids and their original flavonoids inhibition of glucose  
 45 transport at 5 mM glucose and 25 mM glucose in Caco-2 cells (n=3). Phloridzin (Pz) was tested at  
 46 300  $\mu$ M and Phloretin (Pt) was tested at 150  $\mu$ M. EC, EGC, EGCG, TF, and TFMG were tested at  
 47 200  $\mu$ M.

48

49 **Table S1.** Glucose transport inhibition of ethanol extract of *Terminalia chebula* Retz., fructus  
 50 immaturus, dried, and its bioassay directed fractions

| Samples (200 µg/mL)            | % Glucose transport inhibition |                 |
|--------------------------------|--------------------------------|-----------------|
|                                | 5 mM D-Glucose                 | 25 mM D-Glucose |
| Ethanol extract (EE)           | 57.1±6.1                       | 34.2±2.5        |
| Petroleum ether fraction (PE)  | 29.7±1.5                       | 7.9±3.4         |
| Dichloromethane fraction (DCM) | 48.4±1.0                       | 15.9±2.3        |
| Ethyl acetate fraction (EA)    | 82.0±0.7                       | 43.4±2.8        |
| 1-Butanol fraction (1-But)     | 88.0±0.5                       | 57.6±2.1        |
| Water fraction (Water)         | 61.0±1.1                       | 45.0±0.5        |
| 1-Bu-1                         | 0.1                            | -3.2            |
| 1-Bu-2                         | 70.4                           | 79.4            |
| 1-Bu-3                         | 26.8                           | -5.0            |
| 1-Bu-4                         | 24.5                           | 6.3             |
| 1-Bu-5                         | 87.4                           | 102.2           |
| 1-Bu-6                         | 84.9                           | 71.0            |
| 1-Bu-7                         | 24.3                           | 3.1             |
| 1-Bu-8                         | 68.2                           | 55.3            |
| 1-Bu-9                         | 49.4                           | 53.2            |
| 1-Bu-10                        | 50.7                           | 7.0             |
| 1-Bu-11                        | 68.4                           | 14.8            |
| 1-Bu-12                        | 38.6                           | 12.3            |
| 1-Bu-13                        | 26.8                           | 6.4             |
| 1-Bu-14                        | 29.5                           | 9.7             |
| 1-Bu-15                        | 25.8                           | 3.5             |
| 1-Bu-16                        | 4.9                            | 7.0             |
| 1-Bu-17                        | -21.9                          | -8.6            |
| Phloridzin                     | 52.8 ± 0.3                     | 17.8 ± 0.2      |
| Phloretin                      | 84.8 ± 4.1                     | 42.2 ± 3.0      |
| Control                        | 0 ± 2.0                        | 0 ± 1.1         |

51 Phloridzin was tested at 300 µM and Phloretin was tested at 150 µM. The other samples were tested at 200 µg/mL.

**Table S2** Characterization of chemical constituents from active fractions of *Terminalia chebula* Retz., fructus immaturus, dried in negative mode by UPLC-ESI-Q-TOF/MS

| No  | Retention time (min) | Compound name      | Mol. Formula                                    | Exact mass (calc.) | Theoretical m/z (M-H) | Observed m/z (M-H <sup>+</sup> ) | Mass error (ppm) | Major fragment ions: m/z                                                       | Fraction |
|-----|----------------------|--------------------|-------------------------------------------------|--------------------|-----------------------|----------------------------------|------------------|--------------------------------------------------------------------------------|----------|
| S1  | 0.51                 | Gallic acid        | C <sub>7</sub> H <sub>6</sub> O <sub>5</sub>    | 170.022            | 169.0137              | 169.0145                         | 4.7              | 125.0250                                                                       | 1-Bu-2   |
| S2  | 2.92                 | Tri-gallic-glu     | C <sub>27</sub> H <sub>24</sub> O <sub>18</sub> | 636.096            | 635.0884              | 635.0906                         | 3.5              | 465.0678, 313.0569, 221.0455, 169.0150, 125.0246                               | 1-Bu-5   |
| S3  | 2.74                 | Chebunanin         | C <sub>27</sub> H <sub>24</sub> O <sub>19</sub> | 652.091            | 651.0834              | 651.0863                         | 4.5              | 634.0777, 482.0676, 169.0143                                                   | 1-Bu-5   |
| S4  | 2.88                 | Chebulagic acid    | C <sub>41</sub> H <sub>30</sub> O <sub>27</sub> | 954.097            | 953.0896              | 953.0926                         | 3.1              | 463.0514, 337.0200, 300.9990, 275.0197, 205.0508                               | 1-Bu-8   |
| S5  | 4.43                 | Chebulinic acid    | C <sub>41</sub> H <sub>32</sub> O <sub>27</sub> | 956.113            | 955.1053              | 955.1061                         | 0.8              | 786.0858, 686.0689, 618.0804, 466.0702, 337.0183, 275.0199, 169.0131           | 1-Bu-11  |
| S6  | 2.88                 | Corilagin          | C <sub>27</sub> H <sub>22</sub> O <sub>18</sub> | 634.081            | 633.0728              | 633.0734                         | 0.9              | 300.9991, 275.0204, 249.0405, 169.0149                                         | 1-Bu-6   |
| S7  | 0.78                 | Terflavin B        | C <sub>34</sub> H <sub>24</sub> O <sub>22</sub> | 784.076            | 783.0681              | 783.0702                         | 2.7              | 784.0689, 451.9984, 300.9988, 275.0193, 250.0425, 187.0397                     | 1-Bu-2   |
| S8  | 4.61                 | Ellagic acid       | C <sub>14</sub> H <sub>6</sub> O <sub>8</sub>   | 302.006            | 301.1287              | 301.1277                         | -3.3             | 299.9901, 283.9955, 254.9918, 245.0081, 228.0048, 201.0184, 173.0237, 145.0292 | 1-Bu-11  |
| S9  | 3.67                 | Gallagic acid      | C <sub>28</sub> H <sub>10</sub> O <sub>16</sub> | 601.997            | 600.9891              | 600.9901                         | 1.7              | 583.9801, 298.9823, 273.0030, 247.0243                                         | 1-Bu-8   |
| S10 | 2.80                 | Neochebulagic acid | C <sub>41</sub> H <sub>32</sub> O <sub>28</sub> | 972.670            | 971.1002              | 971.0996                         | -0.6             | 954.0937, 802.0819, 634.0767, 337.0205, 300.9993, 249.0405                     | 1-Bu-9   |
| S11 | 3.76                 | Tetra-gallic-glu   | C <sub>34</sub> H <sub>28</sub> O <sub>22</sub> | 788.107            | 787.0994              | 787.1010                         | 2.0              | 636.0900, 618.0793, 484.0804, 466.0696, 295.0437, 169.0134, 125.0254           | 1-Bu-8   |

Tri-gallic-glu: 3,4,6-Tri-O-galloyl-β-D-Glucose

Chebunanin: 1-O-galloyl-2,4-O-chebuloyl-β-D-Glucose

Chebulagic acid: 1-O-galloyl-2,4-O-chebuloyl-3,6-O-HHDP-β-D-Glucose

Chebulinic acid: 1,3,6-tri-O-galloyl-2,4-O-chebuloyl-β-D-Glucose

Corilagin: 1-O-galloyl-3,6-(R)-HHDP-β-D-Glucose

Terflavin B: 4-O-(S)-flavogallonyl-6-O-galloyl-β-D-Glucose

Tetra-gallic-glu: 1,3,4,6-Tetra-O-galloyl-β-D-Glucose
